# Supplementary material for: Continuous vegetation record of the Greater Cape Floristic Region (South Africa) covering the past 300 thousand years (IODP U1479)
Source: Copernicus journal article supplement (doi:10.5194/cp-2021-93), 2021-07-19

Supplementary Figure 3. Accumulation rates of selected pollen taxa and fern spores. On top the sedimentation rates. Zones after stratigraphically constrained cluster analysis (PAST, Hammer et al., 2001).

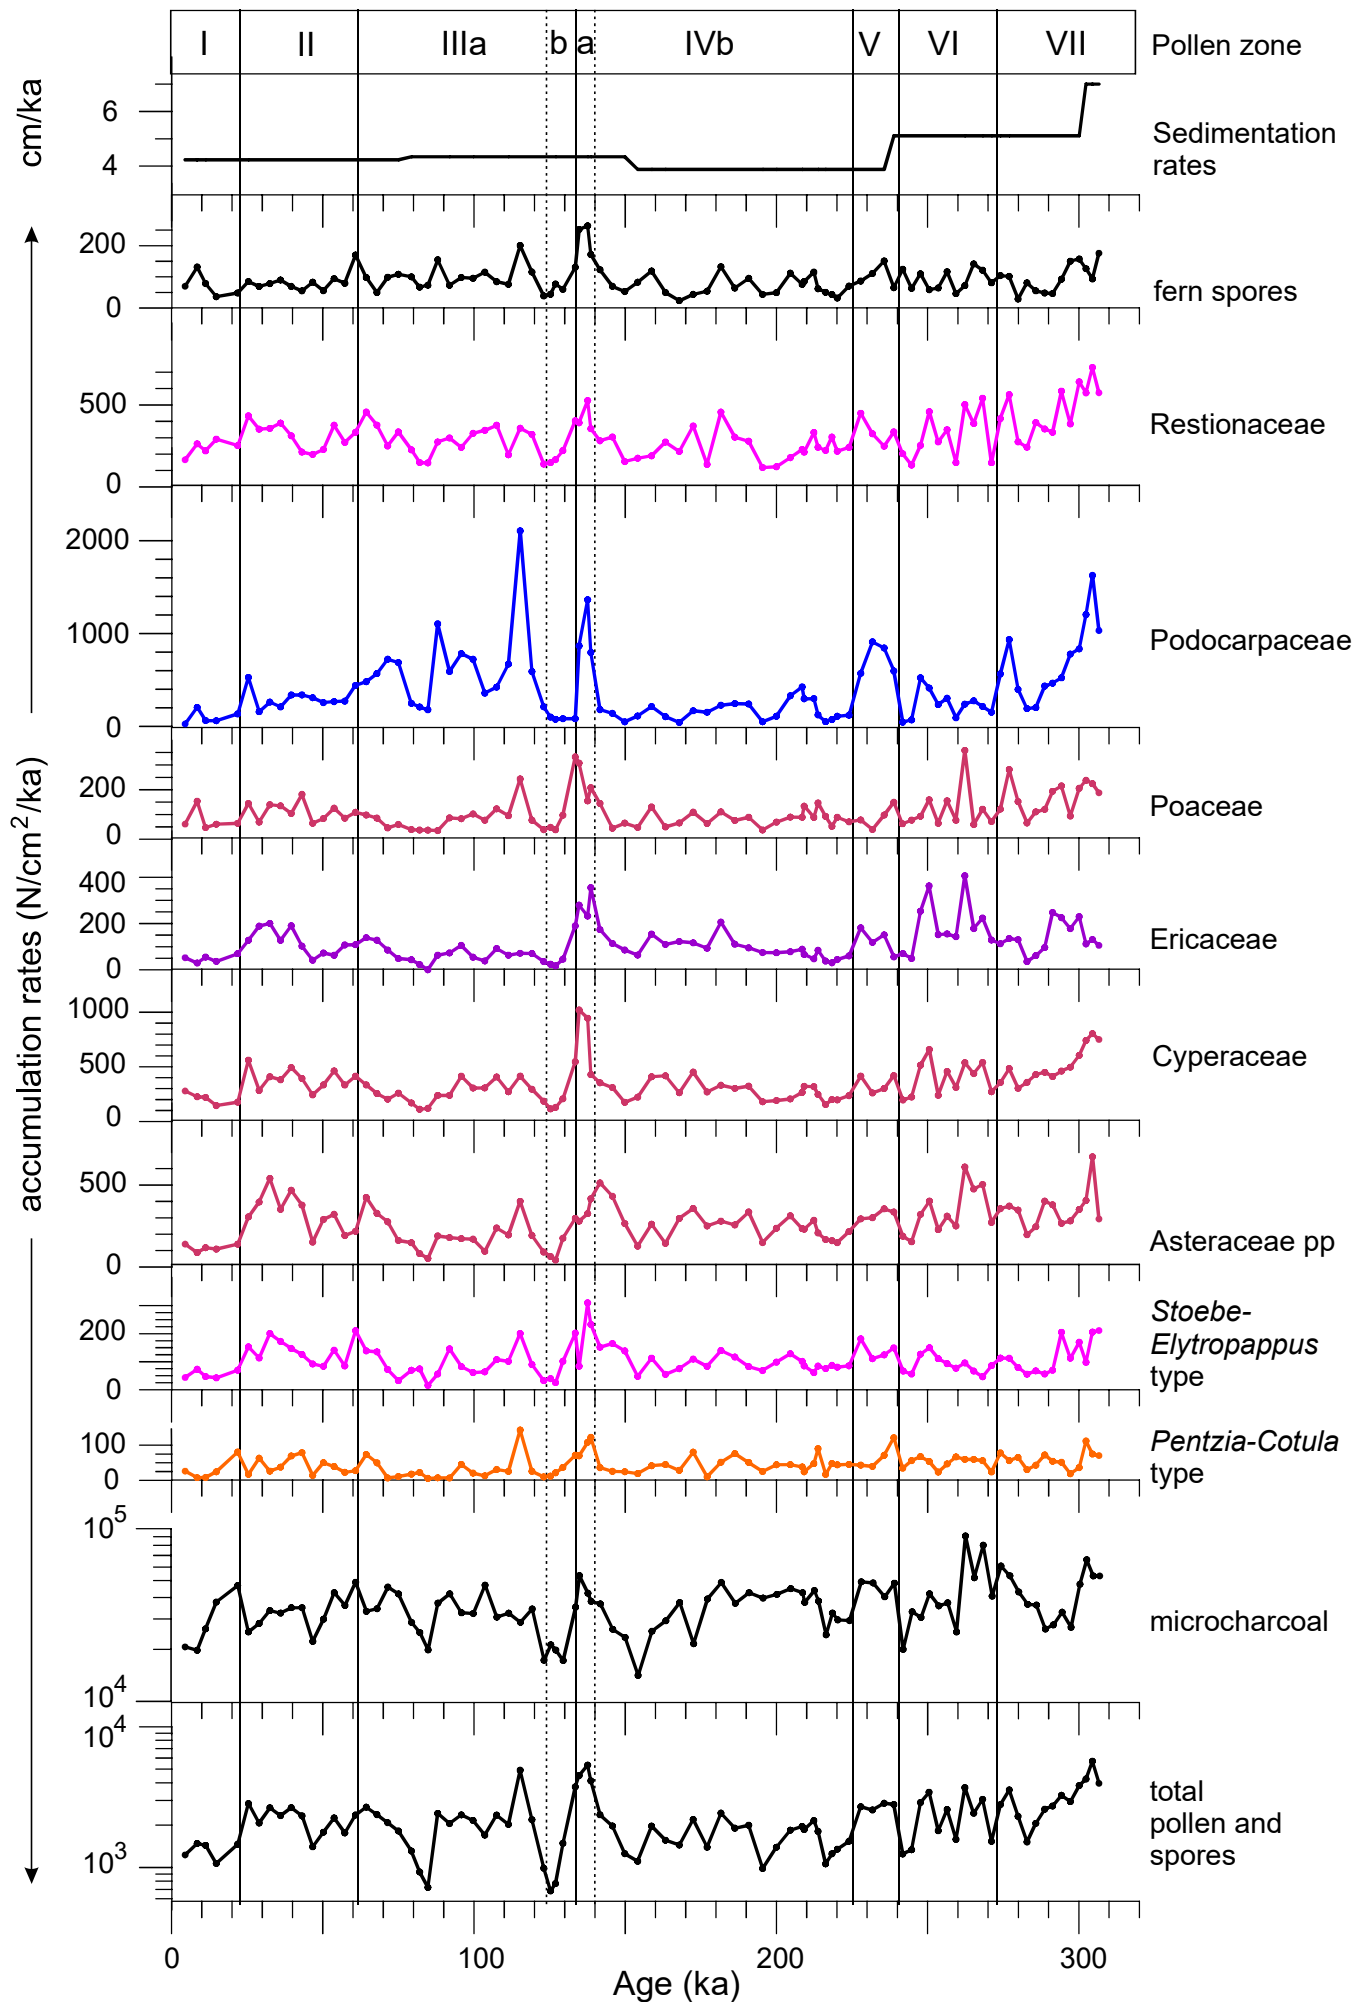

Supplement: Supplementary file 1 [file cp-2021-93-supplement.zip]
