# Supplementary material for: Continuous vegetation record of the Greater Cape Floristic Region (South Africa) covering the past 300 thousand years (IODP U1479)
Source: Copernicus journal article supplement (doi:10.5194/cp-2021-93), 2021-07-19
Supplement: Supplementary file 2 [file cp-2021-93-supplement.zip]

Supplementary Figure 1. Correlation of upper cores of Holes C, B, G, H and I of IODP Site U1479 using the green channel of the color scan (Hall et al., 2017 and Shipboard data). On top the stable oxygen isotopes of *Planulina wuellerstorfi*. VPDB, Vienna standard PeeDee Belemnite.

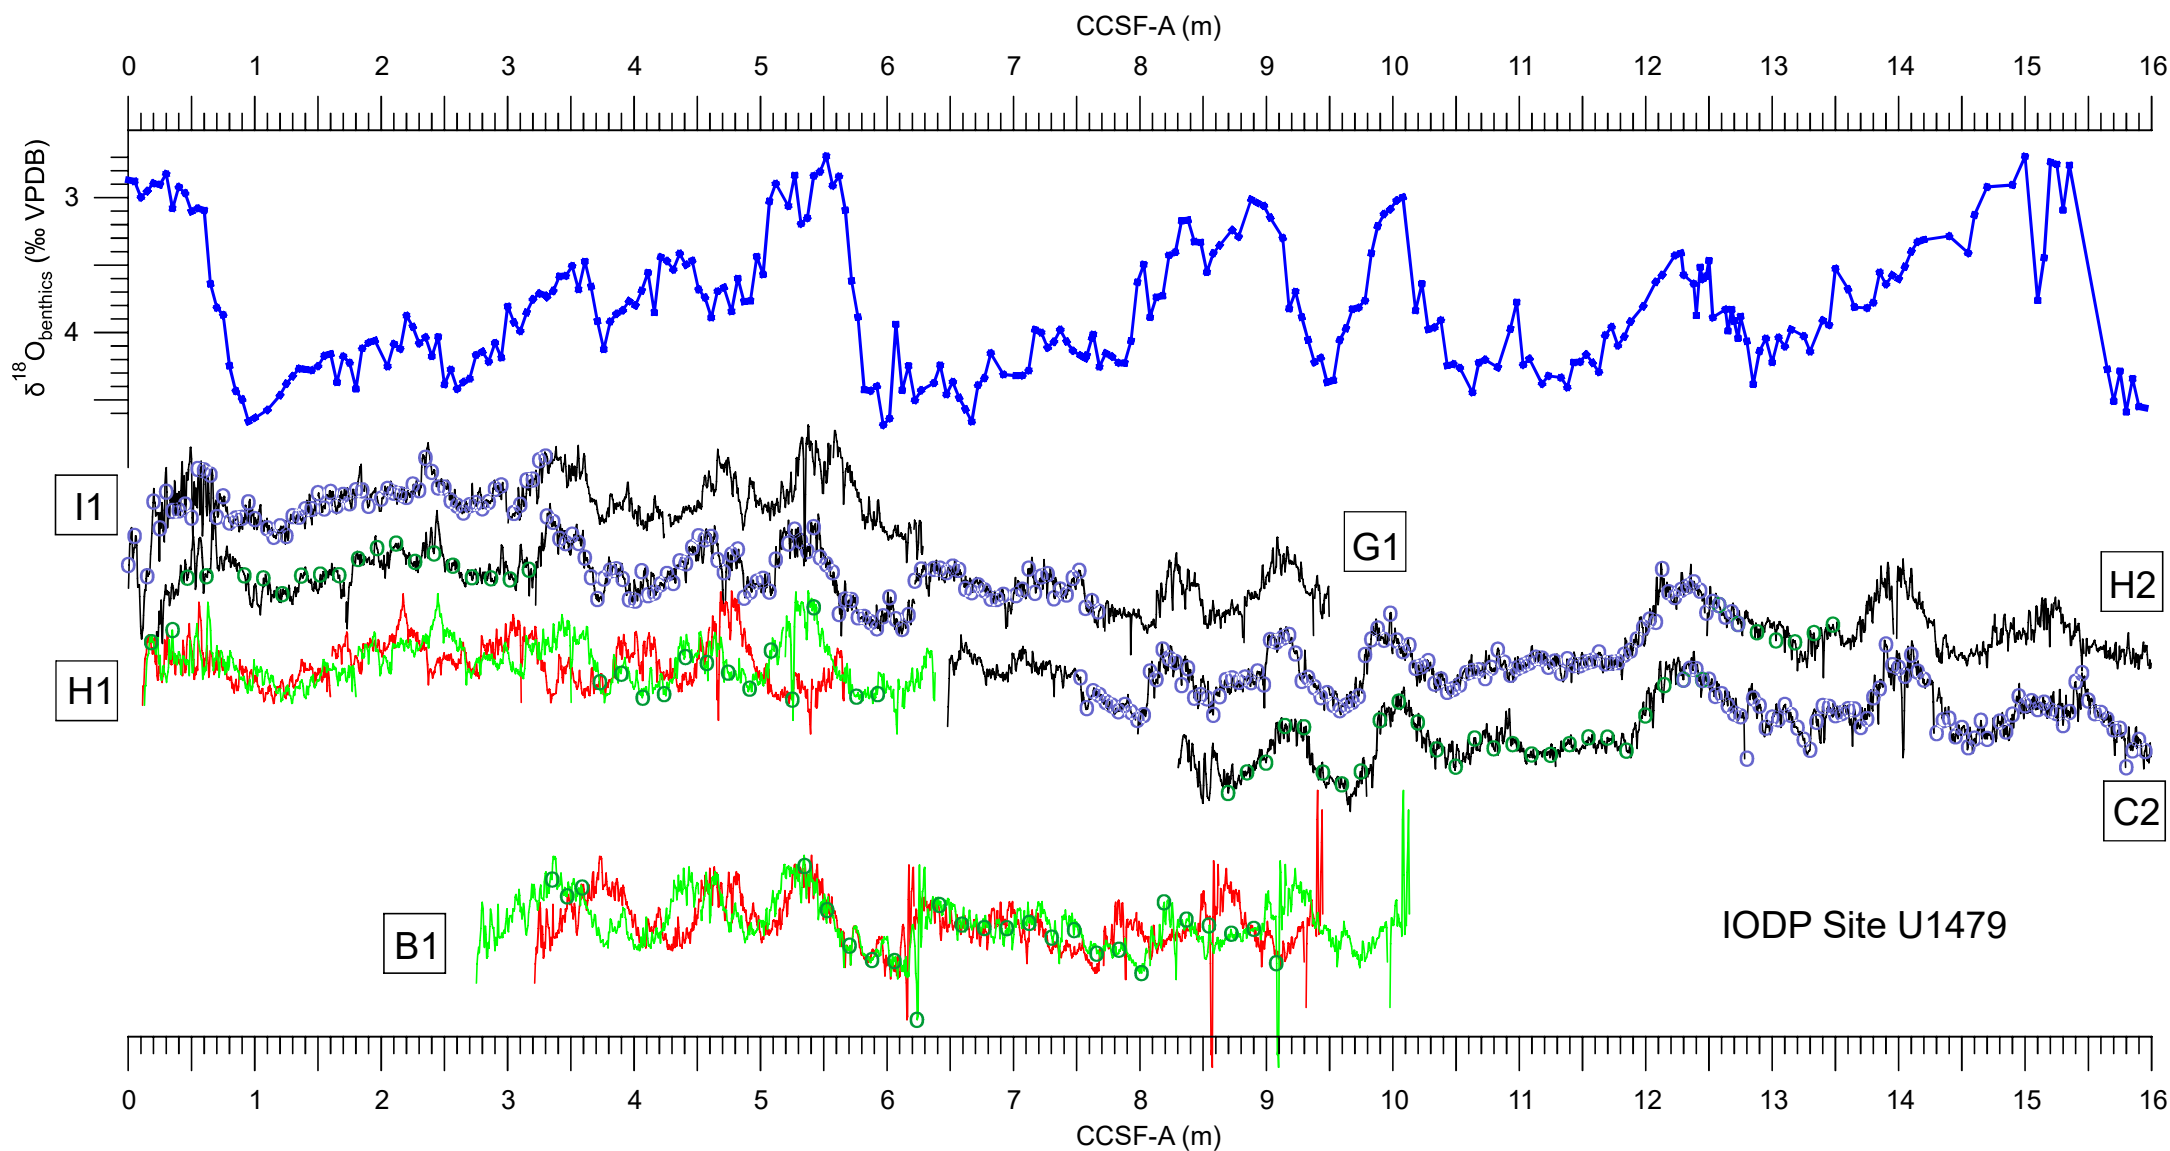

Green channel

Original CCSF Cores C2, G1, I1, H2

Original CCSF Cores B1 & H1

New CCSF Cores B1 & H1

$B1 = 6.5/5.49 \cdot (B1-3) + 2.5$

$H1 = 6.76 / (H1 \cdot 6)$

$\delta^{18}\text{O}_{\text{benthics}}$  Cores I1, G1, H2 C2 (splice)

o pollen samples

o isotope samples
