# Supplementary material for: Continuous vegetation record of the Greater Cape Floristic Region (South Africa) covering the past 300 thousand years (IODP U1479)
Source: Copernicus journal article supplement (doi:10.5194/cp-2021-93), 2021-07-19

Supplementary Figure 4. Comparing Pliocene and Pleistocene pollen percentages of selected taxa. Shadings indicate 95% confidence intervals. On top the stable oxygen isotopes of Site U1479 (black, Zhao et al., 2020; this study) and the global stable oxygen stack LR04 (gray, Lisiecki and Raymo, 2005). Pliocene part after Zhao et al. (2020), Pleistocene part after this study. VPDB, Vienna standard PeeDee Belemnite. VPDB, Vienna standard PeeDee Belemnite.

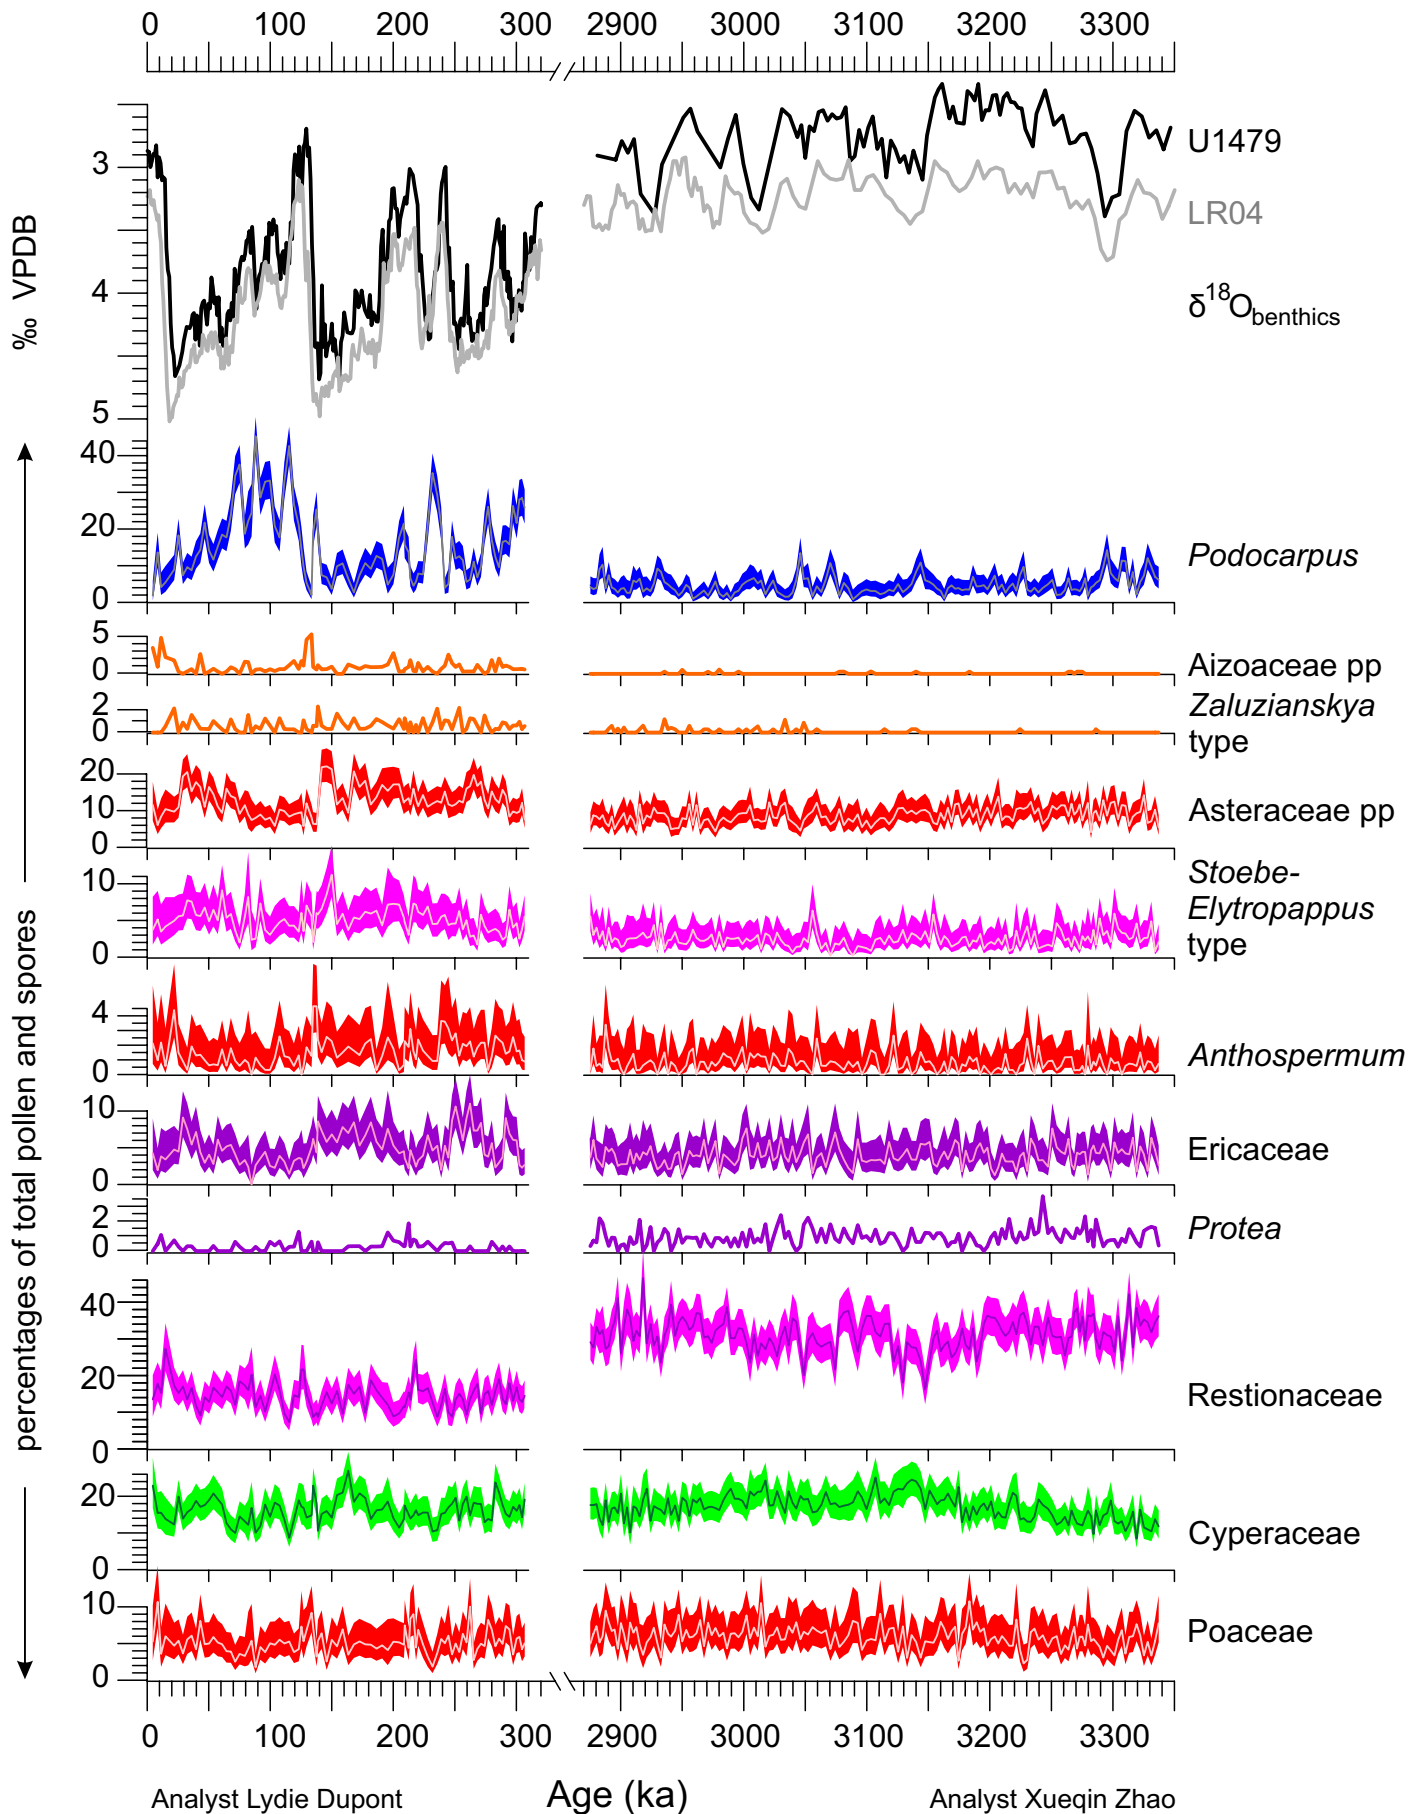

Supplement: Supplementary file 3 [file cp-2021-93-supplement.zip]
