# Supplementary material for: Continuous vegetation record of the Greater Cape Floristic Region (South Africa) covering the past 300 thousand years (IODP U1479)
Source: Copernicus journal article supplement (doi:10.5194/cp-2021-93), 2021-07-19

Supplementary Figure 2a. Percentages of pollen and spores for selected taxa from Fynbos and drought-adapted vegetation. On top the stable oxygen isotopes of benthic foraminifera of Site U1479 (black) and global stack LR04 (gray, Lisiecki and Raymo, 2005). Zones after stratigraphically constrained cluster analysis (PAST, Hammer et al., 2001). VPDB, Vienna standard Pee Dee Belemnite.

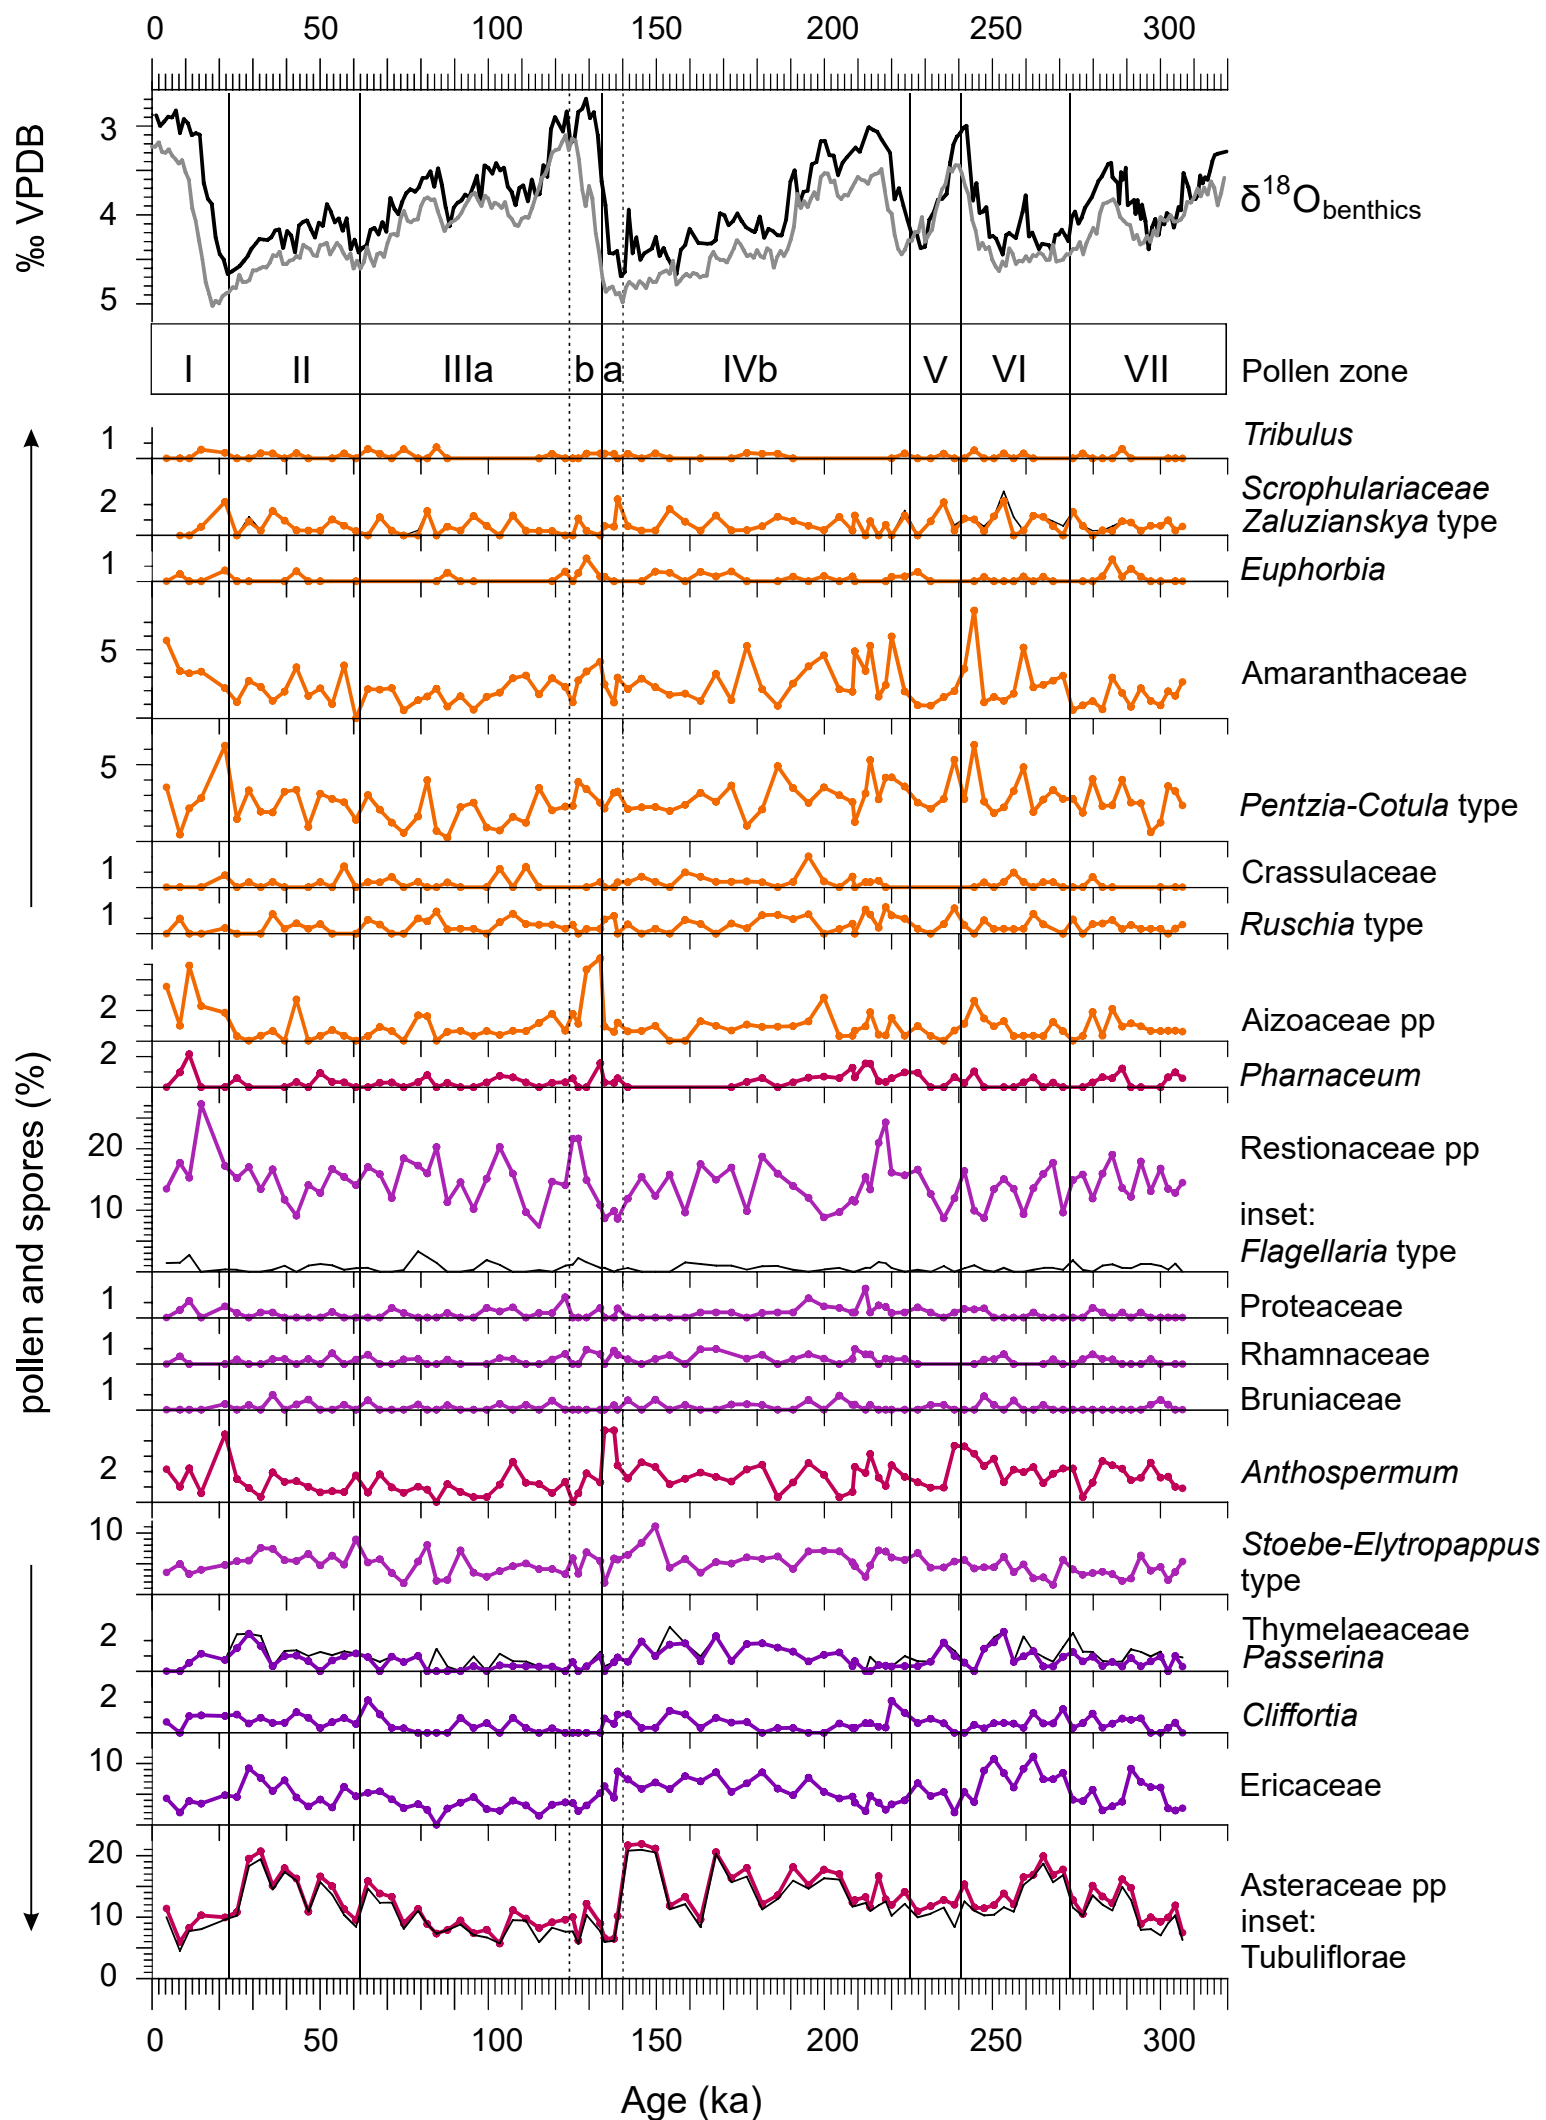

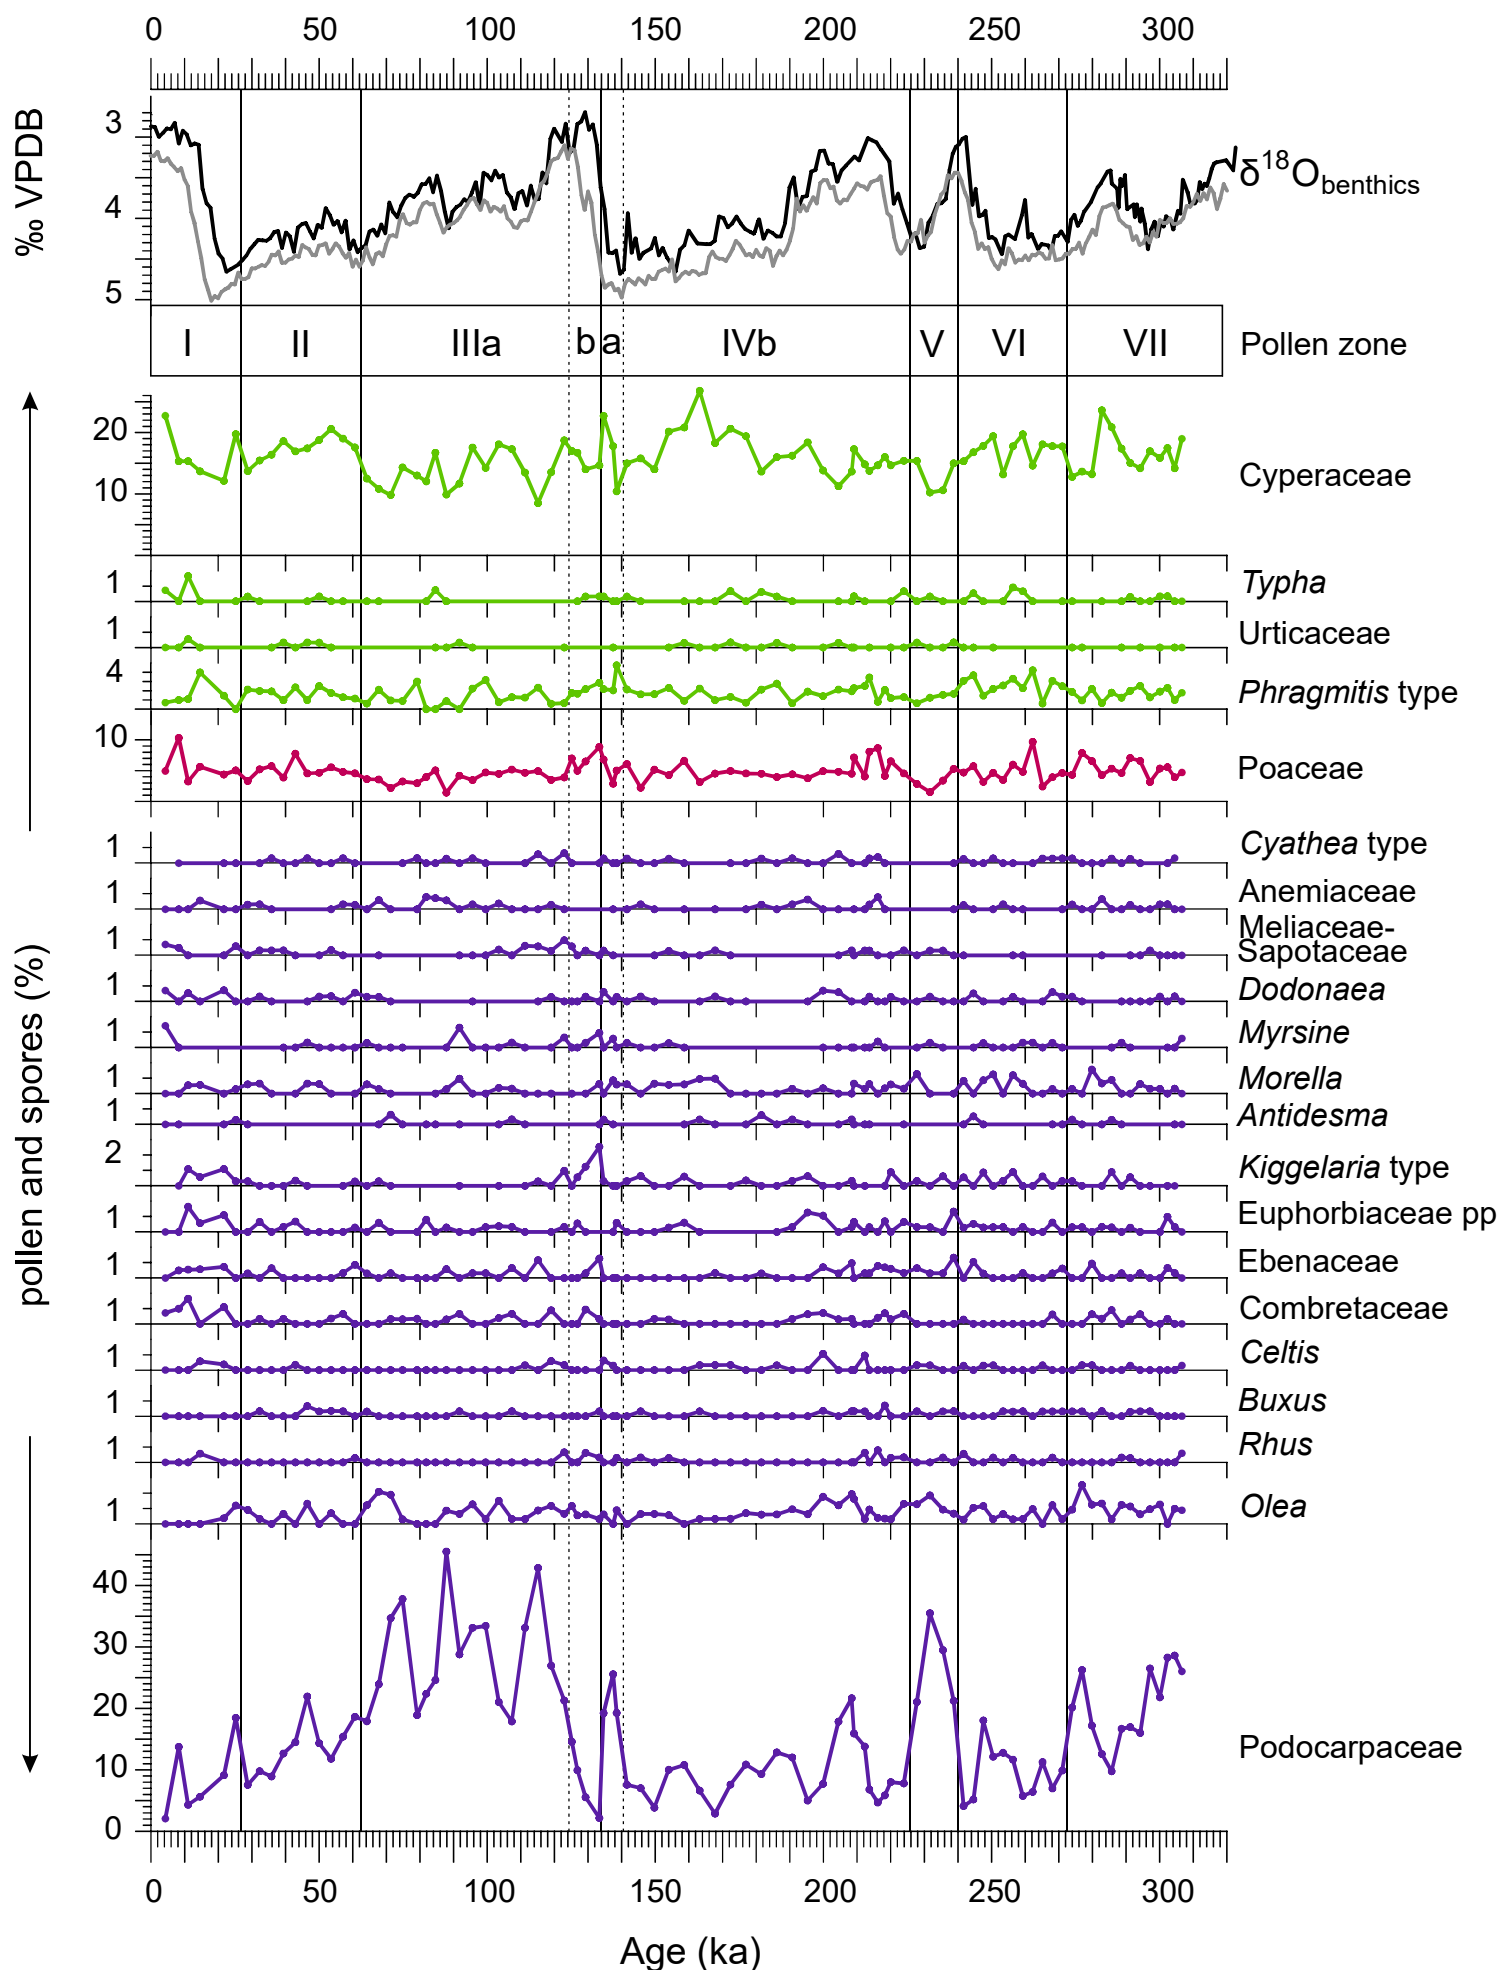

Supplement: Supplementary file 4 [file cp-2021-93-supplement.zip]
